# Supplementary material for: BAZ1B is dispensable for H2AX phosphorylation on Tyrosine 142 during spermatogenesis
Source: PubMed Central journal article supplement (PMC4571090; doi:10.1242/bio.011734), 2015-05-15
Supplement: supp_bio.011734_BIO011734supp.pdf [file supp_bio.011734_BIO011734supp.pdf]

Table S1. Antibody list

| Name                            | Origin                    | Product # | Applications |
|---------------------------------|---------------------------|-----------|--------------|
| Rabbit anti-H2AX                | Cell Signaling            | 7631      | WB           |
| Mouse anti- $\gamma$ H2AX       | Millipore                 | 05-636    | IC, IHC, IP  |
| Rabbit anti-BAZ1B               | Abcam                     | ab50632   | WB           |
| Rabbit anti-H2AX (phospho Y142) | Abcam                     | ab94602   | IC, WB       |
| Rabbit anti-H2AX (phospho Y142) | Millipore                 | 07-1590   | WB           |
| Mouse anti- $\alpha$ -Tubulin   | Sigma                     | 9026      | WB           |
| Mouse anti-SYCP3                | Abcam                     | ab97672   | IC           |
| Rabbit anti-SYCP3               | Novus                     | NB300-232 | IC           |
| Rabbit anti-ATR                 | Cell Signaling            | 2790      | IC           |
| Rabbit anti-TOPBP1              | Gift from Junjie Chen     |           | IC           |
| Rabbit anti-BRCA1               | Generated by Namekawa lab |           | IC           |
| Guinea Pig anti-H1T             | Gift from Mary Ann Handel |           | IC, IHC      |
| Rabbit anti-Cleaved Caspase 3   | Cell Signaling            | 9661      | IHC          |
| Sheep anti-MDC1                 | ABD Serotec               | AHP799    | IC           |
| Rabbit anti-CBX1                | Abcam                     | ab10478   | IHC          |
| Rabbit anti-SMARCA5             | Abcam                     | ab3749    | IC           |
| Rabbit anti-MCPH1               | Bioss                     | bs-11227R | IC           |
